# Supplementary material for: Genome-wide analysis and expression profile of the bZIP transcription factor gene family in grapevine (Vitis vinifera)
Source: PubMed Central journal article supplement (PMC4023599; doi:10.1186/1471-2164-15-281), 2014-04-13

**Additional file 1. The gene structure of VvbZIPs.** (a), The intron-exon arrangement of VvbZIP genes; (b), The number of exons in VvbZIP genes.

(a)

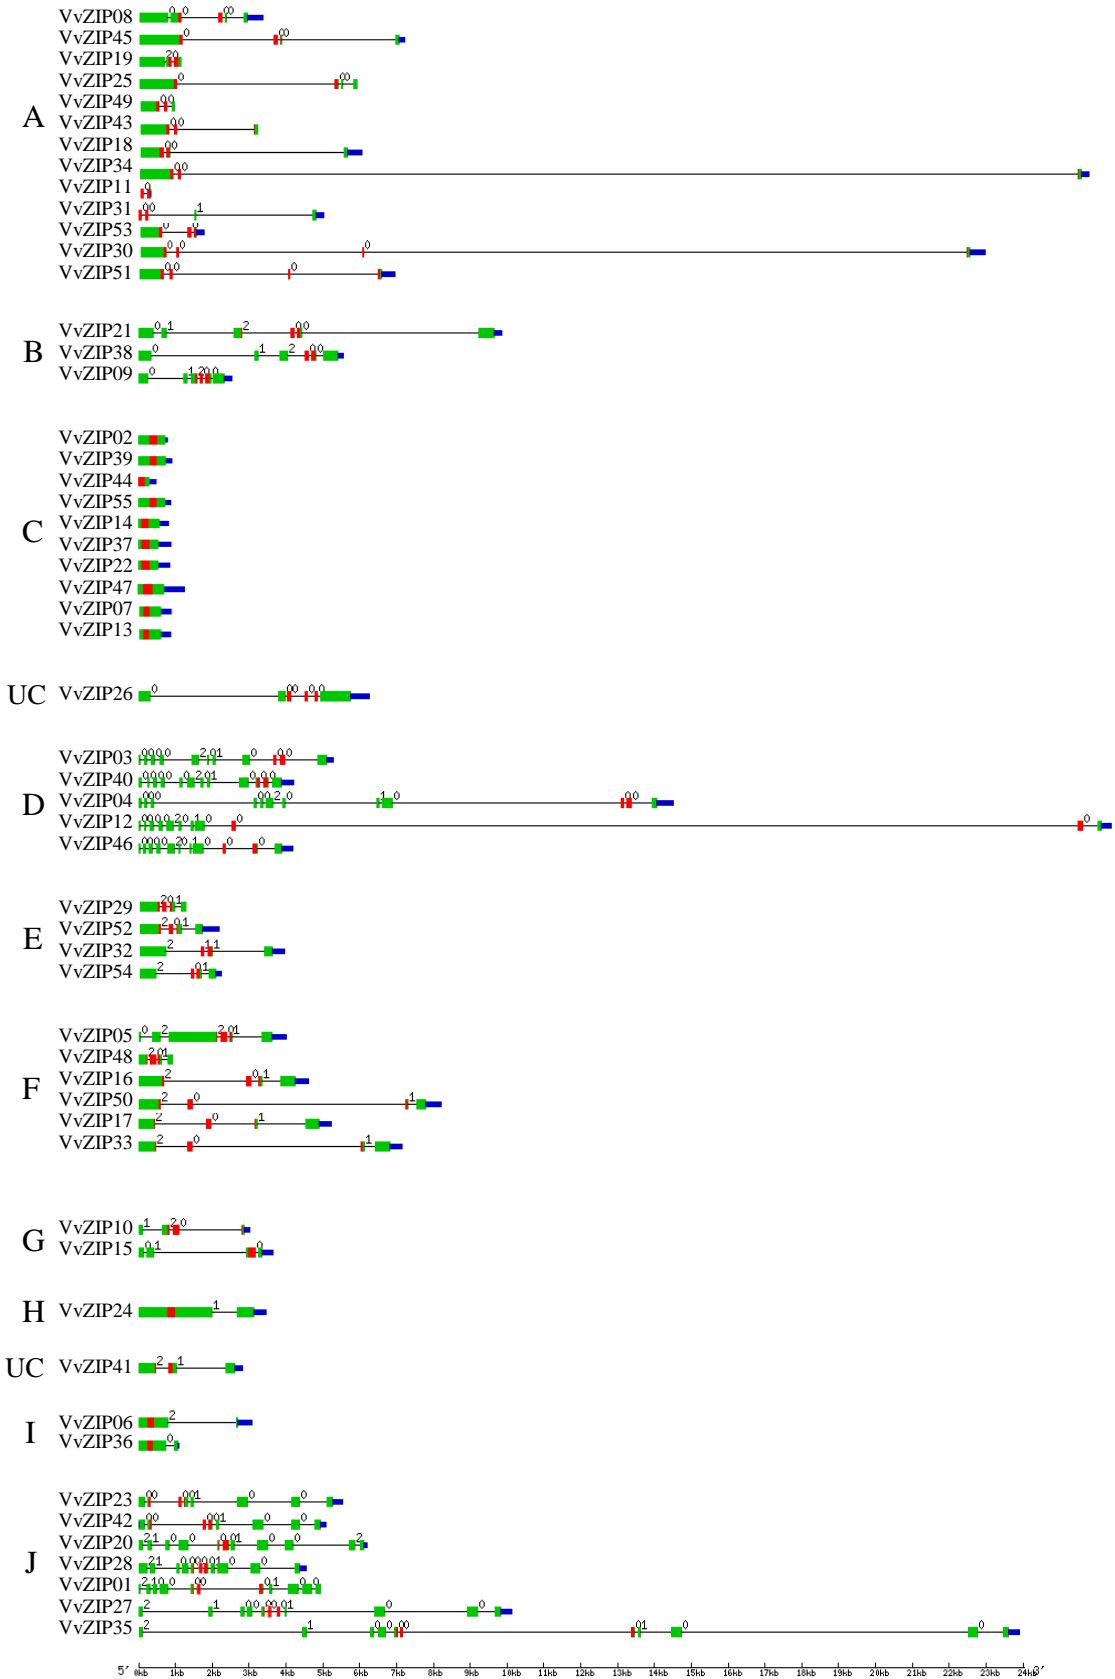

**Legend:**  
■ exon ■ marked region — intron ■ upstream/downstream 0 1 2: intron phase

(b)

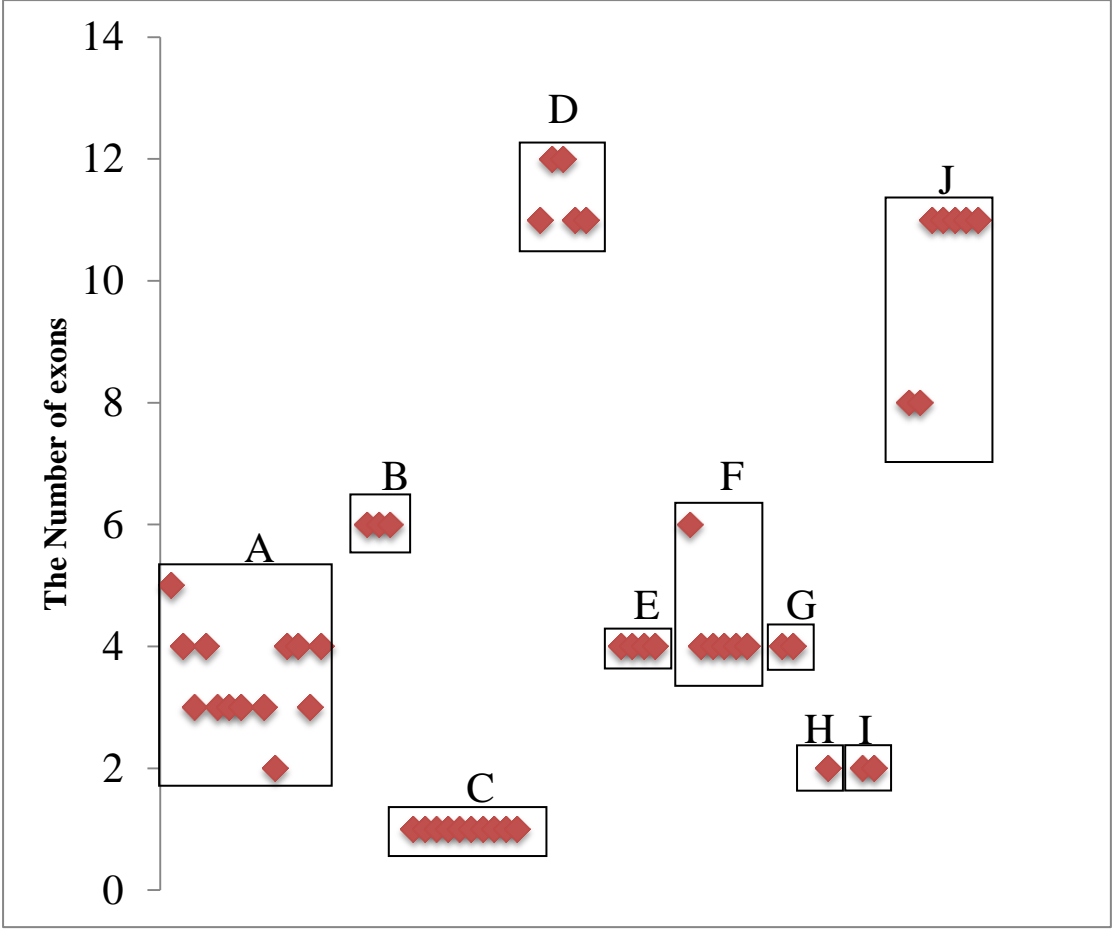

Supplement: 1471-2164-15-281-S1.pdf [file 1471-2164-15-281-S1.pdf]
