# Supplementary material for: Genome-wide analysis and expression profile of the bZIP transcription factor gene family in grapevine (Vitis vinifera)
Source: PubMed Central journal article supplement (PMC4023599; doi:10.1186/1471-2164-15-281), 2014-04-13
Supplement: 1471-2164-15-281-S2.pdf [file 1471-2164-15-281-S2.pdf]

## Additional file 2. The position and pattern of introns within bZIP domain

| VvbZIP NO. | Basic region                                                                       | Leucine zipper               | Patterns of intron |
|------------|------------------------------------------------------------------------------------|------------------------------|--------------------|
|            | 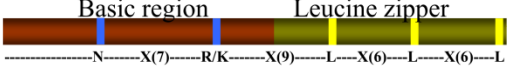 |                              |                    |
| VvbZIP08   | RRQRRMIKNRESAARSRARKQ                                                              | AYTLELEMEVAKLKEANEEL         | <i>a</i>           |
| VvbZIP45   | RRQRRMIKNRESAARSRARKQ                                                              | AYTMELEAEVAKLKEKNEEL         |                    |
| VvbZIP25   | RRQRRMIKNRESAARSRARKQ                                                              | AYTVELEAELNQLKEENTLL         |                    |
| VvbZIP43   | RRQKRMIKNRESAARSRARKQ                                                              | AYTNHLEHEVHQLKENDLL          |                    |
| VvbZIP49   | RRHKRLIKNRESAARSRARKQ                                                              | AYTNELELEVAHLIEENARL         |                    |
| VvbZIP30   | QRQRRMIKNRESAARSRERKQ                                                              | AYTVELESVTHLEEEENARL         |                    |
| VvbZIP51   | QKQRRMIKNRESAARSRERKQ                                                              | AYQVELESSAVRLEEENEQL         |                    |
| VvbZIP18   | RRLKRKIKNRESAARSRARKQ                                                              | AYHNELVSKVSRLEEENVRL         |                    |
| VvbZIP34   | RRQKRMIKNRESAARSRARKQ                                                              | AYTNELENKVSRLLEEENERL        |                    |
| VvbZIP11   | RRQKRMIKNRESAATRSRARKQ                                                             | AYTNELENKVSRLLEEENERL        |                    |
| VvbZIP31   | RRQKRMIKNRESATHSRARKQ                                                              | AYTNELENKVSRLLEEENERL        |                    |
| VvbZIP19   | RRQRRMIKNRESAARSRARKQ                                                              | AYTVELELELNQLKEENTKL         |                    |
| VvbZIP46   | KRQRRKQSNRESARRSRLRKQ                                                              | AECEELQSKVEILSNENHVL         |                    |
| VvbZIP40   | KRERRKQSNRESARRSRLRKQ                                                              | AETEELALKVESLNTENSVL         |                    |
| VvbZIP03   | KRERRKANRESAKKSRLRKQ                                                               | AENEELMRRYETLNEENKAL         |                    |
| VvbZIP04   | KRQRRKQSNRESARRSRLRKQ                                                              | AECEDELAQRADALKEENASL        |                    |
| VvbZIP26   | RRLRRVLANRESARQTIRRRQ                                                              | ALCGELSRKAADLSLENETL         |                    |
| VvbZIP12   | KRQKRRKQSNRESARRSRLRKQ                                                             | AECEELQAKVETLSTENTAL         |                    |
| VvbZIP28   | KTLRRLAQNREAAKRSRLRKK                                                              | AYVQQLLESSRIKLTQLEQE-        |                    |
| VvbZIP35   | KTLRRLAQNREAAKRSRLRKK                                                              | AYVQQLLESSRMKLTQLEQEL        |                    |
| VvbZIP01   | KTLRRLAQNREAAKRSRLRKK                                                              | AYVQQLLECSQLKLTQLEQ--        |                    |
| VvbZIP27   | KTLRRLAQNREAAKRSRLRKK                                                              | AYVQQLENSRLKLTQLEQEL         |                    |
| VvbZIP42   | KTLRRLAQNREAAKRSRLRKK                                                              | AYVQQLLETSRLKLTQLEQEL        |                    |
| VvbZIP23   | KVQRRLAQNREAAKRSRLRKK                                                              | AYVQQLLESSRVKLM-----         |                    |
| VvbZIP17   | KRAKRIILANRQSAARSKERKARYI                                                          | LELERKVQTLQTEATTLQAQLTLYQRD  | <i>c</i>           |
| VvbZIP33   | KRAKRIILANRQSAARSKERKARYI                                                          | LELERKVQTLQTEATTLQAQLTLFQRD  |                    |
| VvbZIP16   | KRAKRIILANRQSAARSKERKMRYIAE                                                        | LELERKVQTLQTEATTLQAQLTLQQRD  |                    |
| VvbZIP05   | KRAKRIILANRQSAARSKERKMRYI                                                          | SELEHKVQTLQTEATTLQAQLTLQQRD  |                    |
| VvbZIP50   | KRAKRIILANRQSAARSKERKIRYTN                                                         | LELERKVQTLQTEATTLQAQVMTLQQRD |                    |
| VvbZIP48   | KRAKRIILANRQSAARSKERKVRMAE                                                         | LEHKVHTLQTEATTLQSHLLTLQQRD   |                    |
| VvbZIP21   | KRARFIMLSNRESARRSRRRQ                                                              | QEHLESELTQIVSGLGVENSLLKRL    | <i>d</i>           |
| VvbZIP38   | KRVRFIMLSNRESARRSRRRQ                                                              | QAHLTELETQIVAQLRLENSLLKRL    |                    |
| VvbZIP09   | KMRRFIMVSNRESARRSRRRQ                                                              | QAHLDLELQIVVEQLRGENASLYKQL   |                    |
| VvbZIP29   | KRVKRIILANRQSAQRSRVRKLYI                                                           | SELEERSVTSLQITEVSVLSPR-      | <i>e</i>           |
| VvbZIP52   | KRVKRIILANRQSAQRSRVRKLYI                                                           | SELEERSVTSLQITEVSALSFRV      |                    |
| VvbZIP32   | -----AQRSRVRKLYIAE                                                                 | LELRNVQALKIAEGSEVSAL         |                    |
| VvbZIP54   | -----AQRSLRKLQYIAE                                                                 | LEMSVQLQIAEGCEISAAV          |                    |
| VvbZIP10   | KRLKRIILRNRVSAQQARERKKAYL                                                          | NELEVRVKDLERKNSELEERL        | <i>f</i>           |
| VvbZIP41   | KKRRRIILRNDAAVRSRERKKT                                                             | YVRDLELKSRYLESECRRLG---      |                    |
| VvbZIP20   | KTLRRLAQNREAAKRSRLRKK                                                              | KAYVQQLLESSRIKLTQLEQDL       | <i>g</i>           |
| VvbZIP53   | KIRRRMIKNRESAARSRARKLA                                                             | YDAQQIEIAKPKKENEFL           |                    |
| VvbZIP02   | RRQRRMISNRESARRSRRRQ                                                               | KHLDLWSQVVRNRNENHSLIDKL      | <i>i</i>           |
| VvbZIP39   | RRQRRMISNRESARRSRRRQ                                                               | KHLDLWSQVWVRNRNENHQLIDKL     |                    |
| VvbZIP44   | -----MISNRESARRSRRRQ                                                               | KHLENLSNEVNRLLVQNRREYKHRL    |                    |
| VvbZIP55   | RRRRRMI SNRESARRSRRRQ                                                              | KHLENLRNQLNQLRIQNRRELTNRL    |                    |
| VvbZIP14   | KKRKRMI SNRESARRSRRRQ                                                              | KHLDLILKRSLELENQRLEIKRRI     |                    |
| VvbZIP37   | KKRRRMLSNRESARRSRRRQ                                                               | KLSEDLISEVSRQLNLNKEIKQTI     |                    |
| VvbZIP22   | RKRKRMI SNRESARRSRRRQ                                                              | KHLDLWSKAAQLQKENGQIAERI      |                    |
| VvbZIP07   | RKRKRMI SNRESARRSRRRQ                                                              | KHLDLMAQAQLRKENSQIITSM       |                    |
| VvbZIP13   | RKRKRMLSNRESARRSRRRQ                                                               | KHLDLMMQMVHLRKENNRIL---      |                    |
| VvbZIP47   | RKRKRMLSNRESARRSRRRQ                                                               | KHLDLMAQVAQLRKENNEILSSI      |                    |
| VvbZIP06   | KSKKRPLGNREAVRKYREKKA                                                              | ASLEDEVVRLRSLNQLLKRRL        |                    |
| VvbZIP36   | -KVRPSPGNREAVRKYREKKA                                                              | HTAYLEEEVKKLRLNQLLVKKL       |                    |
| VvbZIP15   | VLESRLRNRVSAQQARERKK                                                               | VYVNDLESRAQELQDRNSKLEEKI     |                    |
| VvbZIP24   | KKKARLMRNRESAQLSRQ                                                                 | KKHYVEELEEKIRSMHSTIQDLTGKI   |                    |
