# Supplementary material for: Genome-wide analysis and expression profile of the bZIP transcription factor gene family in grapevine (Vitis vinifera)
Source: PubMed Central journal article supplement (PMC4023599; doi:10.1186/1471-2164-15-281), 2014-04-13
Supplement: 1471-2164-15-281-S4.pdf [file 1471-2164-15-281-S4.pdf]

**Additional file 4. The length of Leucine zipper region in bZIP domain of VvbZIP proteins**

|          |                                                                                                     |  |
|----------|-----------------------------------------------------------------------------------------------------|--|
| VvbZIP08 | VVERRQRRMIKRESAARSARKQAYTLELEMEVAKLKEANEEL                                                          |  |
| VvbZIP45 | VIERRQRRMIKRESAARSARKQAYTMELEAEVAKLKEKNEEL                                                          |  |
| VvbZIP34 | TVERRQRRMIKRESAARSARKQAYTNELENKVSRLLEEENERL                                                         |  |
| VvbZIP31 | TIERRQRRMIKRESAATHSARKQAYTNELENKVSRLLEEENERL                                                        |  |
| VvbZIP18 | TVERRLKRKIKRESAARSARKQAYHNELVSKVSRLEEENVRL                                                          |  |
| VvbZIP43 | TIERRQRRMIKRESAARSARKQAYTNHLEHEVHQLKENDLL                                                           |  |
| VvbZIP19 | AVERRQRRMIKRESAARSARKQAYTVELELELNQLKEENTKL                                                          |  |
| VvbZIP25 | VVERRQRRMIKRESAARSARKQAYTVELEALELNQLKEENTLL                                                         |  |
| VvbZIP30 | ATQQRQRRMIKRESAARSERKQAYTVELESVLVTHLEEENARL                                                         |  |
| VvbZIP51 | AAQQKQRRMIKRESAARSERKQAYQVELESASAVRLLEEENEQL                                                        |  |
| VvbZIP49 | SGDRRHKRLIKRESAARSARKQAYTNELELEVAHLIEENARL                                                          |  |
| VvbZIP11 | TIERRQRRMIKRESAATRSARKQAYTNELENKVSRLLEEENERL                                                        |  |
| VvbZIP06 | AEKKSKKRPLGAREAVRKYSEKKKARAASLEDEVVRLRSLNQQ                                                         |  |
| VvbZIP36 | HLISKVRRPSSGAREAVRKYSEKKKAHTAYLEEEVKKLRLLNQQ                                                        |  |
| VvbZIP24 | EEEEKKARLMRESAQLSQRKKHYVELEEKIRSHSTIQDL                                                             |  |
| VvbZIP27 | GDQKTLRRLAQRREAAARKSLRKKAYVQQLENSRMKLTQLEQELQRARQQG                                                 |  |
| VvbZIP35 | -DQKTLRRLAQRREAAARKSLRKKAYVQQLES SRMKLTQLEQELQRARQQG                                                |  |
| VvbZIP01 | GDQKTLRRLAQRREAAARKSLRKKAYVQQLECSQLKLTQLEQELQRARQQG                                                 |  |
| VvbZIP23 | PVDKVRRLAQRREAAARKSLRKKAYVQLEESSRVKLMQLEQELERARQQG                                                  |  |
| VvbZIP42 | TTDKTQRRLAQRREAAARKSLRKKAYVQQLETSRLKLTQLEQELERARQQG                                                 |  |
| VvbZIP28 | PDPKTLRRLAQRREAAARKSLRKKAYVQQLES SRIKLTQLEQELQRARQQG                                                |  |
| VvbZIP53 | AAEKIRRRMIKRESAARSARKLAYDAQQIEIAKLEKKENEFRRIRIVL                                                    |  |
| VvbZIP03 | RQLKRERRKQARRESAKKSLRKQAENEELRMRYETLEENKALKFELSKLTHELDKVRLENTAL                                     |  |
| VvbZIP12 | RELKRQRRKQSRRESARRSLRKQAEECELQAKVETLSTENTARDELQRLSECEK                                              |  |
| VvbZIP46 | RELKRQRRKQSRRESARRSLRKQAEECELQSKVEILSNENHVREELHRLAEQCEKL                                            |  |
| VvbZIP15 | IKLVLESRLLRVRSQAQARERKKVYVNDLESRAQELQDRNSKEEKISTLVNENTML                                            |  |
| VvbZIP10 | KENKRLKRLLRVRSQAQARERKKAYLNELEVRVKDLERKNSELEERLSTLQENQML                                            |  |
| VvbZIP40 | REIKRERRKQSRRESARRSLRKQAETEELALKVESLNTENSVLKSEINRLRENSKIKLENATL                                     |  |
| VvbZIP05 | TDPKRAKRILANRQSAARSERKMRYISELEHKVQTLQTEATTSACLTLQDRSAGLTSQNELKFRQAMEQQAQLRDALNEALTAEVQRL            |  |
| VvbZIP48 | VDPKRAKRILANRQSAARSERKVRMAELLEHKVHTLQTEATTSHELLTLQDRSAGLTSQNELKFRQAMEQQAQLRDALNEALTAEVQRL           |  |
| VvbZIP50 | IDPKRAKRILANRQSAARSERKIRYTNLEERKVVQTLQTEATTSACLTLQDRDITGLTAENKELKRLQAMEQQAQLRDALNEALTAEVQRL         |  |
| VvbZIP16 | IDPKRAKRILANRQSAARSERKMRYIAELERKVVQTLQTEATTSACLTLQDRDITGLTAENKELKRLQAMEQQAQLRDALNEALTAEVQRL         |  |
| VvbZIP29 | VDPKRVKRILANRQSAQRSVVRKLQYISELERSVTSLQTEVSVLSPRVAFLDHQRLILNVDNSALKQRIAAALAQDKIFKDAHQDALKKEIERL      |  |
| VvbZIP52 | IDPKRVKRILANRQSAQRSVVRKLQYISELERSVTSLQTEVSVLSPRVAFLDHQRLILNVDNSALKQRIAAALAQDKIFKDAHQDALKKEIERL      |  |
| VvbZIP41 | QASKRRRQLRNRDAAVRSERKKTYVRDLLELKSRYLESECRRLGHLLQCCFAENQTL                                           |  |
| VvbZIP04 | RELKRQRRKQSRRESARRSLRKQAECDELQARADALEENASLRAEVSRIKSEYEQLLSENASL                                     |  |
| VvbZIP26 | KEARLRLRVLANRESARQTRRRQALCGELSRKAADLSLENETLKREKELAMKEFQSLNKNKHL                                     |  |
| VvbZIP17 | IDPKRAKRILANRQSAARSERKARYILELERKVVQTLQTEATTSACLTLQDRDITGLSTENTELKRLQAMEQQAQLRDALNTALKEEVERL         |  |
| VvbZIP33 | LDPKRAKRILANRQSAARSERKARYILELERKVVQTLQTEATTSACLTLQDRDITGLTENTELKRLQAMEQQAQLRDALNEALKEEVERL          |  |
| VvbZIP55 | AEERKRRRMSRESARRSMRKQKHLENLRNQLNQLRIQNRELTNRLRSFTYHSHLVDSNVQLRSEAIIL                                |  |
| VvbZIP14 | VDEKRRKRMISRESARRSMRKQQLHDDLKRRKSELENQRLETKRRI DMFQKLWEATVGENNALEALKAE                              |  |
| VvbZIP21 | ADEKRARRMISRESARRSMRKQEHLELELQVVSQLVGENSSLLKRLTDINQKYNEAAVDNRVLEKADVETL                             |  |
| VvbZIP38 | ADAKRVRRLMSRESARRSMRKQAHLELELQVAQLRELNSSLLKRLTDISQKYNEAAVDNRVLEKADVETL                              |  |
| VvbZIP09 | NNLKRMRMISRESARRSMRKQAHLELELQVVEQLRGENASLYKQLTDASQQFGDANTNRRVLEKSDVEAL                              |  |
| VvbZIP02 | IDERKQRRMISRESARRSMRKQKHLDELWSQVVRLENNENHSLIDKLNHVSECHDRVLQENVRLKKEASDLRQMLTDLRIGSPYTLRELELRQMLTDL  |  |
| VvbZIP39 | INERKQRRMISRESARRSMRKQKHLDELWSQVVRLENNENHSLIDKLNHVSECHDRVLQENVRLKKEASELRQMVTDLQLNSPYENLRDLELRQMVTDL |  |
| VvbZIP44 | -----MISRESARRSMRKKKHLENLSNEVNRLLVQNRELYKHLGVSVTHQCHLVGRDNERLTYEYLALRKLKYDL                         |  |
| VvbZIP07 | MDQRKRKRMISRESARRSMRKQKHLDDLMAQAAQLRKENSQLITSMNVTTQHYFNIEAENSVLRAQFSELSNRLQYLVEIISFL                |  |
| VvbZIP13 | MDQRKRKRMISRESARRSMRKQKHLDDLMAQMVHLRKENNRLTSMNVTTQFHMNVAEANAILRAQMAELTLRLQTLNEIMDYL                 |  |
| VvbZIP47 | MDQRKRKRMISRESARRSMRKQKHLDDLMAQVAQLRKENNELSSINITNQRYLTVADNSILRAQAMELSHRYQSL                         |  |
| VvbZIP22 | IDDRKRKRMISRESARRSMRKQKHLDDLKSKAAQLQKENGQLAERIDKTTLEYIKLASDNVNAQIVELTDRLQSL                         |  |
| VvbZIP37 | MDEKRRRMLMSRESARRSMKKQKLSDELISEVSRQLNQLNKEIKQTI DATITQGYQNEVSEANVLEVAQKMLVDRLNSE                    |  |
| VvbZIP32 | ETDTKRAKQQAQRSRVRKLQYIAELERNVQALEAGSEVSAELDFNQNLISMENKA                                             |  |
| VvbZIP54 | KNDAKRAKQQAQRSLRKLQYIAELMSVQVLAEGCEISAAVEYLDQHNLISGMKNRA                                            |  |

I

II

III

IV

V

VI

VII

VIII

IX

U
