# Supplementary material for: Genome-wide analysis and expression profile of the bZIP transcription factor gene family in grapevine (Vitis vinifera)
Source: PubMed Central journal article supplement (PMC4023599; doi:10.1186/1471-2164-15-281), 2014-04-13
Supplement: 1471-2164-15-281-S5.pdf [file 1471-2164-15-281-S5.pdf]

Additional file 5. Alignment of bZIP domain of VvbZIP proteins.

| Group    | bZIP No. or ID (Published)                                   | Basic region                                   | Hinge | Leucin zipper |
|----------|--------------------------------------------------------------|------------------------------------------------|-------|---------------|
| A        | Pp1s49_161V6.1 PACid_18041314<br>91900 PACid_15419211        | ERRQRRMIFNRESAARSRAARKQAYTVELEAEVSQLKEENMRL    |       |               |
|          | AmTr_v1.0_scaffold00132.19                                   | ERRQRRMIFNRESAARSRAARKQAYTVELEAELTQLKEENTRL    |       |               |
|          | OsbZIP66 (TRAB1)                                             | ERRQRRMIFNRESAARSRAARKQAYTVELEAEVQKLKEENMEL    |       |               |
|          | AtbZIP36 (ABF2/AREB1)                                        | ERRQRRMIFNRESAARSRAARKQAYTVELEAEVAKLKEENDEL    |       |               |
|          | AtbZIP39 (ABI5)                                              | ERRQRRMIFNRESAARSRAARKQAYTVELEAELNQLKEENAQL    |       |               |
|          | AtbZIP14 (FD)                                                | NRRHKRMIFNRESAARSRAARKQAYTVELELEVAHLQAEENARL   |       |               |
|          | VvbZIP08                                                     | ERRQRRMIFNRESAARSRAARKQAYTVELEMEVAKLKEENDEL    |       |               |
|          | VvbZIP45                                                     | ERRQRRMIFNRESAARSRAARKQAYTVELEAEVAKLKEENDEL    |       |               |
|          | VvbZIP19                                                     | ERRQRRMIFNRESAARSRAARKQAYTVELELELNQLKEENTKL    |       |               |
|          | VvbZIP25                                                     | ERRQRRMIFNRESAARSRAARKQAYTVELEAELNQLKEENTLL    |       |               |
|          | VvbZIP49                                                     | DRRHKRLIFNRESAARSRAARKQAYTVELELEVAHLIEENARL    |       |               |
|          | VvbZIP34                                                     | ERRQRRMIFNRESAARSRAARKQAYTVELELNKVSRLKEENERL   |       |               |
|          | VvbZIP18                                                     | ERRLKRKIFNRESAARSRAARKQAYHNELVSKVSRLEEENVRL    |       |               |
|          | VvbZIP11                                                     | ERRQRRMIFNRESAARSRAARKQAYTVELELNKVSRLKEENERL   |       |               |
|          | VvbZIP31                                                     | ERRQRRMIFNRESAARSRAARKQAYTVELELNKVSRLKEENERL   |       |               |
|          | VvbZIP43                                                     | ERRQRRMIFNRESAARSRAARKQAYTNHLEHEVHQLKKEENDLL   |       |               |
| VvbZIP51 | QQQRRMIFNRESAARSRAARKQAYTVELESAVRLKEENDEL                    |                                                |       |               |
| VvbZIP30 | QQQRRMIFNRESAARSRAARKQAYTVELESVTHLEENARL                     |                                                |       |               |
| VvbZIP53 | EKIRRMIFNRESAARSRAARKLAYDAQQIETAKLKEENEFLL                   |                                                |       |               |
| B        | Pp1s355_24V6.1 PACid_18061228<br>270282 PACid_15418897       | EKRKRRLMIFNRESAARSRAARKQAYTVELEVAQLRVENSTL     |       |               |
|          | AmTr_v1.0_scaffold00002.534                                  | MKRMRRLMIFNRESAARSRAARKQAHMSDLEMQVAQLRVENSTL   |       |               |
|          | OsbZIP33 (REB)                                               | VKRVRRLMIFNRESAARSRAARKQAHLSLELTQVAQLRVENSSL   |       |               |
|          | AtbZIP9 (BZO2H2)                                             | QRLQRRMIFNRESAARSRAARKQAHLNLELAQVQLRVENSSL     |       |               |
|          | AtbZIP10 (BZO2H1)                                            | LKRIIRRLMIFNRESAARSRAARKQAYTVELETVQVDSLKGDNSTL |       |               |
|          | VvbZIP09                                                     | VKKSRLMIFNRESAARSRAARKQAYTVELETVQVNDLKGHESSL   |       |               |
|          | VvbZIP38                                                     | LKRMRRLMIFNRESAARSRAARKQAHLNLELAQVQLRVENSSL    |       |               |
| VvbZIP21 | AKRVRLMIFNRESAARSRAARKQAHLTELETVQVQLRVENSSL                  |                                                |       |               |
| VvbZIP21 | EKRAREMIFNRESAARSRAARKQAHLSLELTQVSQLGVENSSL                  |                                                |       |               |
| C        | Pp1s83_243V6.3 PACid_18073560<br>17886 PACid_15423144        | ERRQRRMIFNRESAARSRAARKQAYTVELEVAQLRVENSTL      |       |               |
|          | AmTr_v1.0_scaffold00065.59                                   | DKKQRRMIFNRESAARSRAARKQAHMSDLEMQVAQLRVENSTL    |       |               |
|          | OsbZIP38 (LIP19)                                             | EKRQRRMIFNRESAARSRAARKQAHMSDLEMQVAQLRVENSTL    |       |               |
|          | AtbZIP11 (ATB2)                                              | ERKRRMIFNRESAARSRAARKQAHMSDLEMQVAQLRVENSTL     |       |               |
|          | AtbZIP2 (GBF5)                                               | QRKRRLMIFNRESAARSRAARKQAHMSDLEMQVAQLRVENSTL    |       |               |
|          | VvbZIP14                                                     | ERKRRMIFNRESAARSRAARKQAHMSDLEMQVAQLRVENSTL     |       |               |
|          | VvbZIP37                                                     | EKRKRRLMIFNRESAARSRAARKQAHMSDLEMQVAQLRVENSTL   |       |               |
|          | VvbZIP22                                                     | EKRKRRLMIFNRESAARSRAARKQAHMSDLEMQVAQLRVENSTL   |       |               |
|          | VvbZIP47                                                     | DRKRRLMIFNRESAARSRAARKQAHMSDLEMQVAQLRVENSTL    |       |               |
|          | VvbZIP07                                                     | QRKRRLMIFNRESAARSRAARKQAHMSDLEMQVAQLRVENSTL    |       |               |
|          | VvbZIP13                                                     | QRKRRLMIFNRESAARSRAARKQAHMSDLEMQVAQLRVENSTL    |       |               |
|          | VvbZIP02                                                     | QRKRRLMIFNRESAARSRAARKQAHMSDLEMQVAQLRVENSTL    |       |               |
|          | VvbZIP39                                                     | ERKQRRMIFNRESAARSRAARKQAHMSDLEMQVAQLRVENSTL    |       |               |
| VvbZIP44 | ERKQRRMIFNRESAARSRAARKQAHMSDLEMQVAQLRVENSTL                  |                                                |       |               |
| VvbZIP55 | ERKRRMIFNRESAARSRAARKQAHMSDLEMQVAQLRVENSTL                   |                                                |       |               |
| D        | Pp1s33_301V6.1 PACid_18056930<br>125734 PACid_15409254       | VKRQRRKQSNRESAARSRAARKQAYTVELEVAQLRVENSTL      |       |               |
|          | AmTr_v1.0_scaffold00059.69                                   | LKRQRRKQSNRESAARSRAARKQAYTVELEVAQLRVENSTL      |       |               |
|          | OsbZIP05 (OSBZ8)                                             | LKRQRRKQSNRESAARSRAARKQAYTVELEVAQLRVENSTL      |       |               |
|          | AtbZIP41 (GBF1)                                              | SKREARRKQSNRESAARSRAARKQAYTVELEVAQLRVENSTL     |       |               |
|          | AtbZIP55 (GBF3)                                              | LKRQRRKQSNRESAARSRAARKQAYTVELEVAQLRVENSTL      |       |               |
|          | AtbZIP54                                                     | LKREARRKQSNRESAARSRAARKQAYTVELEVAQLRVENSTL     |       |               |
|          | VvbZIP40                                                     | VKREARRKQSNRESAARSRAARKQAYTVELEVAQLRVENSTL     |       |               |
|          | VvbZIP04                                                     | IKREARRKQSNRESAARSRAARKQAYTVELEVAQLRVENSTL     |       |               |
|          | VvbZIP12                                                     | LKRQRRKQSNRESAARSRAARKQAYTVELEVAQLRVENSTL      |       |               |
|          | VvbZIP46                                                     | LKRQRRKQSNRESAARSRAARKQAYTVELEVAQLRVENSTL      |       |               |
| VvbZIP03 | LKREARRKQSNRESAARSRAARKQAYTVELEVAQLRVENSTL                   |                                                |       |               |
| E        | Pp1s62_67V6.1 PACid_18047687<br>402651 PACid_15405830        | PKRAKRILANRQSAQRSRAARKQAYTVELEVAQLRVENSTL      |       |               |
|          | AmTr_v1.0_scaffold00030.119                                  | PKRARRILANRQSAQRSRAARKQAYTVELEVAQLRVENSTL      |       |               |
|          | OsbZIP21                                                     | DTRLKG---PRRHQPQRSRAARKQAYTVELEVAQLRVENSTL     |       |               |
|          | AtbZIP61                                                     | EKSLK----RRSQQRSRAARKQAYTVELEVAQLRVENSTL       |       |               |
|          | AtbZIP34                                                     | PKRVKRILANRQSAQRSRAARKQAYTVELEVAQLRVENSTL      |       |               |
|          | VvbZIP32                                                     | PKRVKRILANRQSAQRSRAARKQAYTVELEVAQLRVENSTL      |       |               |
|          | VvbZIP54                                                     | TKRAK----QQFAQRSRAARKQAYTVELEVAQLRVENSTL       |       |               |
| VvbZIP29 | AKRAK----QQFAQRSRAARKQAYTVELEVAQLRVENSTL                     |                                                |       |               |
| VvbZIP52 | PKRVKRILANRQSAQRSRAARKQAYTVELEVAQLRVENSTL                    |                                                |       |               |
| F        | Pp1s20_118V6.1 PACid_18057370<br>77868 PACid_15421625        | PKRAKRILANRQSAARSRAARKQAYTVELEVAQLRVENSTL      |       |               |
|          | AmTr_v1.0_scaffold00077.51                                   | PKRAKRILANRQSAARSRAARKQAYTVELEVAQLRVENSTL      |       |               |
|          | OsbZIP30 (RF2b)                                              | PKRAKRILANRQSAARSRAARKQAYTVELEVAQLRVENSTL      |       |               |
|          | AtbZIP59 (PosF21)                                            | PKRAKRILANRQSAARSRAARKQAYTVELEVAQLRVENSTL      |       |               |
|          | AtbZIP51 (VIP1)                                              | PKRAKRILANRQSAARSRAARKQAYTVELEVAQLRVENSTL      |       |               |
|          | VvbZIP33                                                     | PKRAKRILANRQSAARSRAARKQAYTVELEVAQLRVENSTL      |       |               |
|          | VvbZIP17                                                     | PKRAKRILANRQSAARSRAARKQAYTVELEVAQLRVENSTL      |       |               |
|          | VvbZIP16                                                     | PKRAKRILANRQSAARSRAARKQAYTVELEVAQLRVENSTL      |       |               |
|          | VvbZIP05                                                     | PKRAKRILANRQSAARSRAARKQAYTVELEVAQLRVENSTL      |       |               |
|          | VvbZIP48                                                     | PKRAKRILANRQSAARSRAARKQAYTVELEVAQLRVENSTL      |       |               |
| G        | Pp1s80_72V6.1 PACid_18053259<br>99404 PACid_15416436         | HKRLKRLLENRVAQAQRAERKKAYLGELEVRSKELEHFNDEL     |       |               |
|          | AmTr_v1.0_scaffold00081.79                                   | HKRLKRLLENRVAQAQRAERKKAYVVELEAKARDLELFADEL     |       |               |
|          | OsbZIP01                                                     | HKRLKRLLENRVAQAQRAERKKAYLGELEVRSKELEHFNDEL     |       |               |
|          | AtbZIP66 (HY5)                                               | QNRLLKRLLENRVAQAQRAERKKAYMTELEAKAKDLELFADEL    |       |               |
|          | AtbZIP64 (HYH)                                               | NKRLKRLLENRVAQAQRAERKKAYLGELEVRSKELEHFNDEL     |       |               |
| VvbZIP10 | YRSLKRLLENRVAQAQRAERKKAYVVSDELESRANLEQNNNDQL                 |                                                |       |               |
| VvbZIP15 | NKRLKRLLENRVAQAQRAERKKAYLGELEVRSKELEHFNDEL                   |                                                |       |               |
| VvbZIP15 | LVLESRLLENRVAQAQRAERKKAYVVDDELESRANLEQNNNDQL                 |                                                |       |               |
| H        | Pp1s25_341V6.1 PACid_18074558<br>73198 PACid_15404652        | KRR-ARLMEFNRESAQAQRAERKKAYVVDLEGGKRLMTATVADL   |       |               |
|          | AmTr_v1.0_scaffold00101.96                                   | KRK-ARLMEFNRESAQAQRAERKKAYVVDLEERVVRLNATVAEL   |       |               |
|          | OsbZIP50                                                     | KKK-ARLMEFNRESAQAQRAERKKAYVVDLEDPKVRAMHSTIAEL  |       |               |
|          | AtbZIP28                                                     | SKKKRRQMFNRESAQAQRAERKKAYVVDLETKSKYLEAEACRRL   |       |               |
|          | AtbZIP49                                                     | KKRLIRQIFNRESAQAQRAERKKAYVVDLETRKVKSMNATIAEL   |       |               |
| VvbZIP24 | KKK-ARLMEFNRESAQAQRAERKKAYVVELEEKIRSMHSTIQDL                 |                                                |       |               |
| I        | Pp1s34_90V6.1 PACid_18072449<br>409920 PACid_15406219        | HNSKKRFLCNREAVRKYREKKKAYTVELEEVVHHLRGINQQL     |       |               |
|          | AmTr_v1.0_scaffold00152.6                                    | QSSKKRFLCNREAVRKYREKKKAYTVELEEVVHHLRGINQQL     |       |               |
|          | OsbZIP53                                                     | QKKKRRFLCNREAVRKYREKKKAYTVELEEVVHHLRGINQQL     |       |               |
|          | AtbZIP19                                                     | NASKKRFLCNREAVRKYREKKKAYTVELEEVVHHLRGINQQL     |       |               |
|          | AtbZIP23                                                     | KKGKRRFLCNREAVRKYREKKKAYTVELEEVVHHLRGINQQL     |       |               |
|          | VvbZIP06                                                     | SSGKRRFLCNREAVRKYREKKKAYTVELEEVVHHLRGINQQL     |       |               |
| VvbZIP36 | KKSKRRFLCNREAVRKYREKKKAYTVELEEVVHHLRGINQQL                   |                                                |       |               |
| J        | Pp1s30_324V6.1 PACid_18038859<br>231344 PACid_15416054       | SFALRRLACNREAAARKSFLRKKAYVQCLESSRIHLTQIECEL    |       |               |
|          | AmTr_v1.0_scaffold00010.267                                  | SFTLRLRACNREAAARKSFLRKKAYVQCLESSRIHLTQIECEL    |       |               |
|          | OsbZIP11                                                     | IFVILRLRACNREAAARKSFLRKKAYVQCLESSRIHLTQIECEL   |       |               |
|          | AtbZIP20 (AHBP-1b/TGA2)                                      | ATLERRRACNREAAARKSFLRKKAYVQCLESSRIHLTQIECEL    |       |               |
|          | AtbZIP26 (OBF5/TGA5)                                         | QFTLRLRACNREAAARKSFLRKKAYVQCLESSRIHLTQIECEL    |       |               |
|          | AtbZIP57 (OBF4/TGA4)                                         | QFTLRLRACNREAAARKSFLRKKAYVQCLESSRIHLTQIECEL    |       |               |
|          | VvbZIP20                                                     | IFVILRLRACNREAAARKSFLRKKAYVQCLESSRIHLTQIECEL   |       |               |
|          | VvbZIP27                                                     | ATLERRRACNREAAARKSFLRKKAYVQCLESSRIHLTQIECEL    |       |               |
|          | VvbZIP35                                                     | QFTLRLRACNREAAARKSFLRKKAYVQCLESSRIHLTQIECEL    |       |               |
|          | VvbZIP01                                                     | QFTLRLRACNREAAARKSFLRKKAYVQCLESSRIHLTQIECEL    |       |               |
| VvbZIP28 | IFVILRLRACNREAAARKSFLRKKAYVQCLESSRIHLTQIECEL                 |                                                |       |               |
| VvbZIP42 | IFVILRLRACNREAAARKSFLRKKAYVQCLESSRIHLTQIECEL                 |                                                |       |               |
| VvbZIP23 | IFVILRLRACNREAAARKSFLRKKAYVQCLESSRIHLTQIECEL                 |                                                |       |               |
| UC       | Pp1s150_133V6.1 PACid_18057493<br>439314 PACid_15423134      | ARLRLRVQCNRESARQTLRRKQVLCBELARAVAGELQAEKDNL    |       |               |
|          | OsbZIP80 (OsZIP-2a)                                          | IFRLRRLRACNRESARQTLRRKQVLCBELARAVAGELQAEKDNL   |       |               |
|          | AtbZIP62                                                     | AKLRLRVLACNRESARQTLRRKQVLCBELARAVAGELQAEKDNL   |       |               |
| VvbZIP26 | ERRIRRLRACNRESARQTLRRKQVLCBELARAVAGELQAEKDNL                 |                                                |       |               |
| VvbZIP62 | ARLRLRVLACNRESARQTLRRKQVLCBELARAVAGELQAEKDNL                 |                                                |       |               |
| UC       | Pp1s447_20V6.1 PACid:18054017<br>AmTr_v1.0_scaffold00022.112 | PKRRLRLEKNREAAARKSFLRKKAYVQCLESSRIHLTQIECEL    |       |               |
|          | AtbZIP60                                                     | SKKRRRQIRNREAAARKSFLRKKAYVQCLESSRIHLTQIECEL    |       |               |
|          | OsbZIP50                                                     | AKKRRRVRNREAAARKSFLRKKAYVQCLESSRIHLTQIECEL     |       |               |
| VvbZIP41 | SKKRRRQIRNREAAARKSFLRKKAYVQCLESSRIHLTQIECEL                  |                                                |       |               |
